# Supplementary material for: Prevalence of sexual dysfunction in Chinese patients with schizophrenia: a systematic review and meta-analysis
Source: PubMed Central journal article supplement — Sex Med. 2024 Mar 31;12(2):qfae009. doi: 10.1093/sexmed/qfae009 (PMC10982523; doi:10.1093/sexmed/qfae009), 2024-03-31

## Supplementary material

Index:

1. Database search strategy
2. Quality assessment of studies
3. Sensitivity analysis: Leave-one-out analyses
4. Egger's test
5. Forest plot of subgroup analyses
  - 5.1 Forest plot of specific type subgroup analyses
    - 5.1.1 Forest plot of specific type subgroup analyses-Male
    - 5.1.2 Forest plot of specific type subgroup analyses-Female
  - 5.2 Forest plot of duration of illness subgroup analyses
  - 5.3 Forest plot of assessment tools subgroup analyses
  - 5.4 Forest plot of mean ages subgroup analyses
  - 5.5 Forest plot of study region subgroup analyses
  - 5.6 Forest plot of gender subgroup analyses
  - 5.7 Forest plot of research setting subgroup analyses
  - 5.8 Forest plot of marital status subgroup analyses
  - 5.9 Forest plot of publication years subgroup analyses
  - 5.10 Forest plot of antipsychotics subgroup analyses
6. Meta-regression analyses and Bubble plot

## 1. Database search strategy

### **Pubmed:**

#1 Search: "Schizophrenia"[Mesh]

#2 Search: Schizophrenia [Title/Abstract] OR schizophrenias [Title/Abstract] OR schizoaffective [Title/Abstract] OR 'schizophrenic disorders' [Title/Abstract] OR 'disorders schizophrenic' [Title/Abstract] OR 'schizophrenic disorder' [Title/Abstract] OR psychotic [Title/Abstract] OR Psychosis [Title/Abstract] OR 'dementia praecox' [Title/Abstract]

#3 Search: #1 or #2

#4 Search: "Sexual Dysfunction, Physiological"[Mesh]

#5 Search: 'Sexual dysfunction' [Title/Abstract] OR 'sexual adverse events' [Title/Abstract] OR 'sexual side effects' [Title/Abstract] OR 'sexual disorder' [Title/Abstract] OR libido [Title/Abstract] OR 'hypersex' [Title/Abstract] OR orgasm [Title/Abstract] OR anorgasm\* [Title/Abstract] OR dyspareuni\* [Title/Abstract] OR penis dysfunction [Title/Abstract] OR impotence [Title/Abstract]

#6 Search: #4 or #5

#7 Search: #3 and #6

### **Web of Science:**

#1 ((TS=(Schizophrenia)) OR TI=(Schizophrenia or schizophrenic disorders\* or schizo\* or psychotic or Psychosis or dementia praecox)) OR AB=( Schizophrenia or schizophrenic disorders\* or schizo\* or psychotic or Psychosis or dementia praecox)

#2 ((TS=( Sexual Dysfunction, Physiological)) OR TI=(Sexual dysfunction or sexual adverse events or sexual side effects or sexual disorder or libido or hyper sex or orgasm or anorgasm\* or dyspareuni\* or penis dysfunction or impotence)) OR AB=(Sexual dysfunction or sexual adverse events or sexual side effects or sexual disorder or libido or hyper sex or orgasm or anorgasm\* or dyspareuni\* or penis dysfunction or impotence)

#3 1 and 2

### **Embase:**

#1 'schizophrenia'/exp OR schizophrenia OR schizophrenias OR schizoaffective OR 'schizophrenic disorders' OR 'disorder schizophrenic' OR 'schizophrenic disorder' OR 'psychotic'/exp OR psychotic OR 'psychosis'/exp OR psychosis OR 'dementia praecox'/exp OR 'dementia praecox'

#2 ('Sexual dysfunction' or 'sexual adverse events' or 'sexual side effects' or 'sexual disorder' or libido or 'hyper sex' or orgasm or anorgasm\* or dyspareuni\* or penis dysfunction or impotence)

#3 #1 AND #2

**PsycINFO:**

1 MA Schizophrenia OR TI (Schizophrenia or schizophrenic disorders\* or schizo\* or psychotic or Psychosis or dementia praecox) OR AB (Schizophrenia or schizophrenic disorders\* or schizo\* or psychotic or Psychosis or dementia praecox)

2 TI (Sexual dysfunction or sexual adverse events or sexual side effects or sexual disorder or libido or hyper sex or orgasm or anorgasm\* or dyspareuni\* or penis dysfunction or impotence) OR AB (Sexual dysfunction or sexual adverse events or sexual side effects or sexual disorder or libido or hyper sex or orgasm or anorgasm\* or dyspareuni\* or penis dysfunction or impotence)

3 S1 AND S2

**China National Knowledge Infrastructure (CNKI) 中国知网:**

(主题: 精神分裂症 + 分裂样精神病 + 精神障碍(精确)) AND (主题: 性功能障碍 + 性副作用 + 性不良事件 + 性别障碍 + 性欲 + 性欲亢进 + 性高潮 + 性变态 + 性交困难 + 阴茎功能障碍 + 阳痿(精确))

**China Science and Technology Journal Database 维普:**

题名或关键词=精神分裂症 or 分裂样精神病 or 精神障碍 AND 题名或关键词=性功能障碍 or 性副作用 or 性不良事件 or 性别障碍 or 性欲 or 性欲亢进 or 性高潮 or 性变态 or 性交困难 or 阴茎功能障碍 or 阳痿

**Wanfang Medical Network 万方医学网:**

主题:(精神分裂症 or 分裂样精神病 or 精神障碍) and 主题:(性功能障碍 or 性副作用 or 性不良事件 or 性别障碍 or 性欲 or 性欲亢进 or 性高潮 or 性变态 or 性交困难 or 阴茎功能障碍 or 阳痿)

**Huayi Academic Literature Database 台湾华艺数据库:**

(精神分裂症 or 分裂样精神病 or 精神障碍) = 题名.关键词.摘要 AND (性功能障碍 or 性副作用 or 性不良事件 or 性别障碍 or 性欲 or 性欲亢进 or 性高潮 or 性变态 or 性交困难 or 阴茎功能障碍 or 阳痿) = 题名.关键词.摘要

## 2. Quality assessment of studies

| Included studies | 1 | 2 | 3 | 4 | 5  | 6 | 7  | 8 | 9 | 10 | 11 | Total |
|------------------|---|---|---|---|----|---|----|---|---|----|----|-------|
| Tsai-2011        | Y | Y | Y | Y | UR | Y | Y  | Y | Y | Y  | N  | 9     |
| Gong-1992        | Y | Y | N | Y | UR | Y | UR | Y | N | N  | N  | 5     |
| Hou-2016         | Y | Y | Y | Y | UR | Y | Y  | Y | N | Y  | N  | 8     |
| Huang-2019       | Y | Y | N | Y | UR | Y | Y  | Y | N | Y  | N  | 7     |
| Liu-2021         | Y | Y | Y | Y | UR | N | Y  | Y | Y | Y  | N  | 8     |
| Ma-2018          | Y | Y | Y | Y | UR | Y | Y  | Y | Y | Y  | N  | 9     |
| Ng-2004          | Y | Y | N | Y | UR | N | Y  | Y | N | N  | N  | 5     |
| Shi-2003         | Y | N | N | Y | UR | Y | UR | Y | N | N  | N  | 4     |
| Wang-2016        | Y | Y | N | Y | UR | Y | N  | Y | N | Y  | N  | 6     |
| Xu-2009          | Y | Y | N | Y | UR | N | UR | Y | N | N  | N  | 4     |
| Xiang-2011       | Y | Y | Y | Y | UR | N | N  | Y | N | Y  | N  | 6     |
| Yan-2014         | Y | Y | Y | Y | UR | N | UR | Y | N | N  | N  | 5     |
| Zhang-1992       | Y | Y | Y | Y | UR | N | UR | Y | N | N  | N  | 5     |
| Zou1994          | Y | Y | Y | Y | UR | N | UR | Y | N | N  | N  | 5     |
| Zhang-2001       | Y | Y | N | Y | UR | N | UR | Y | N | N  | N  | 4     |
| Zhang-2018       | Y | Y | Y | Y | UR | N | UR | Y | Y | Y  | N  | 7     |

'Y'=Yes; 'N'=No; 'UR'=Unclear

'1'= Has the source of the data been clearly stated?

'2'= Have the inclusion and exclusion criteria for the exposed and non-exposed groups been listed?

'3'= Have the time period for patient identification been specified?

'4'= If it's not a population source, are the study subjects continuous?

'5'= Has the evaluator's subjective factors obscured other aspects of the study subjects?

'6'= Has any evaluation been described to ensure quality?

'7'= Have the reasons for excluding any patients been explained?

'8'= Have measures for evaluating and/or controlling confounding factors been described?

'9'= If possible, has an explanation been provided for how missing data was handled in the analysis?

'10'= Has the patient response rate and data collection completeness been summarized?

'11'= If follow-up is available, has the percentage of patient incomplete data or follow-up outcomes been described?

### 3. Sensitivity analysis: Leave-one-out analyses

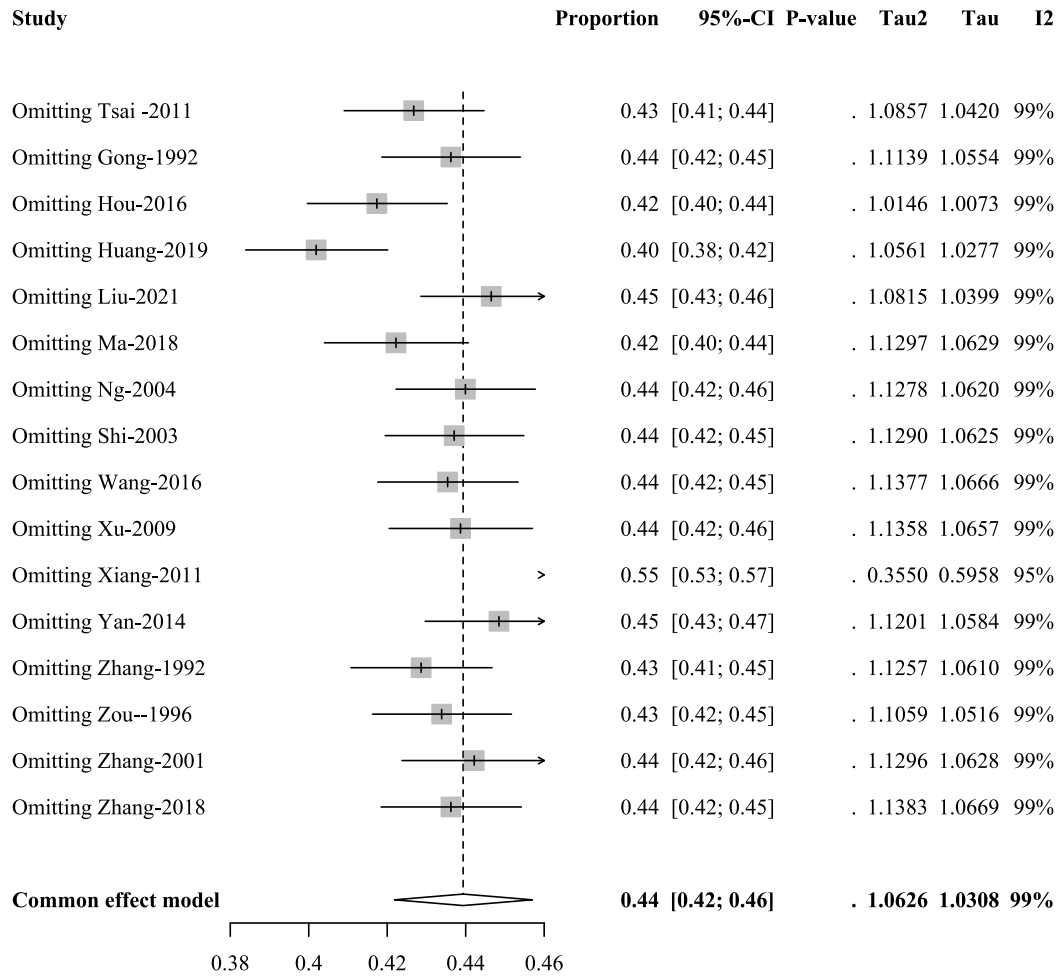

#### 4. Egger's test

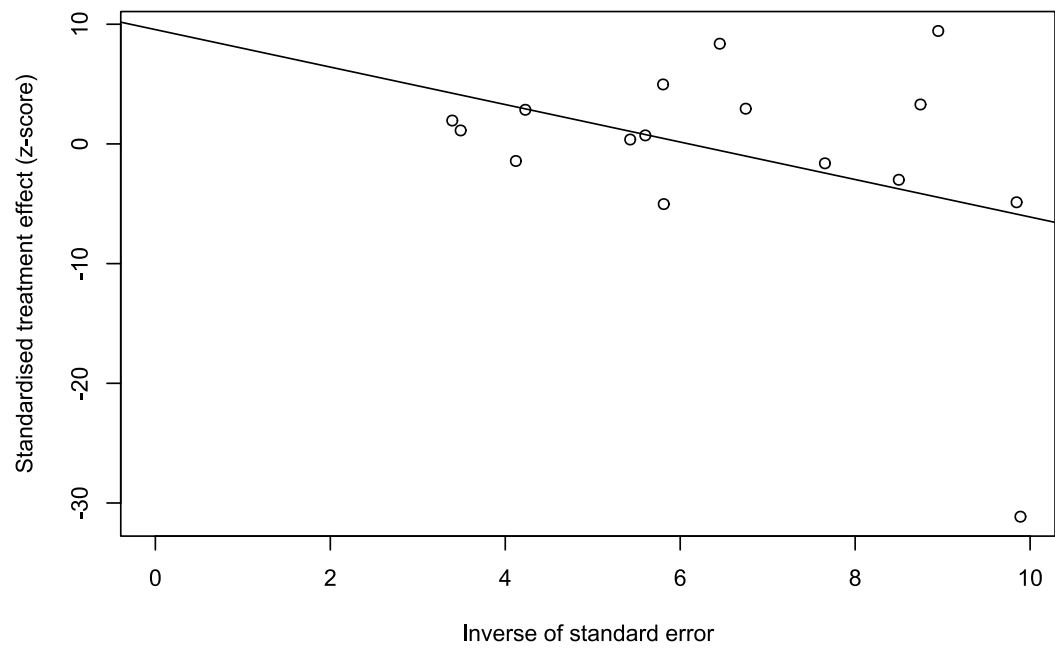

## 5.1 Forest plot of specific type subgroup analyses

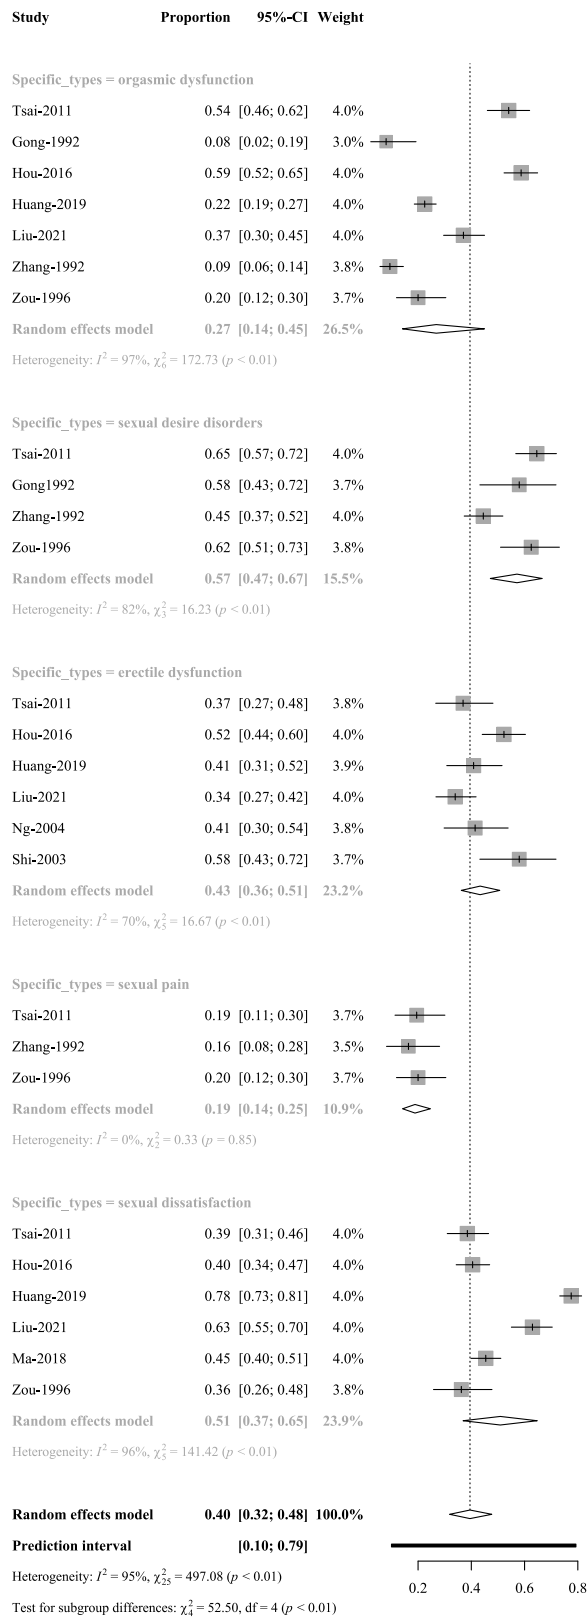

### 5.1.1 Forest plot of specific type subgroup analyses-Male

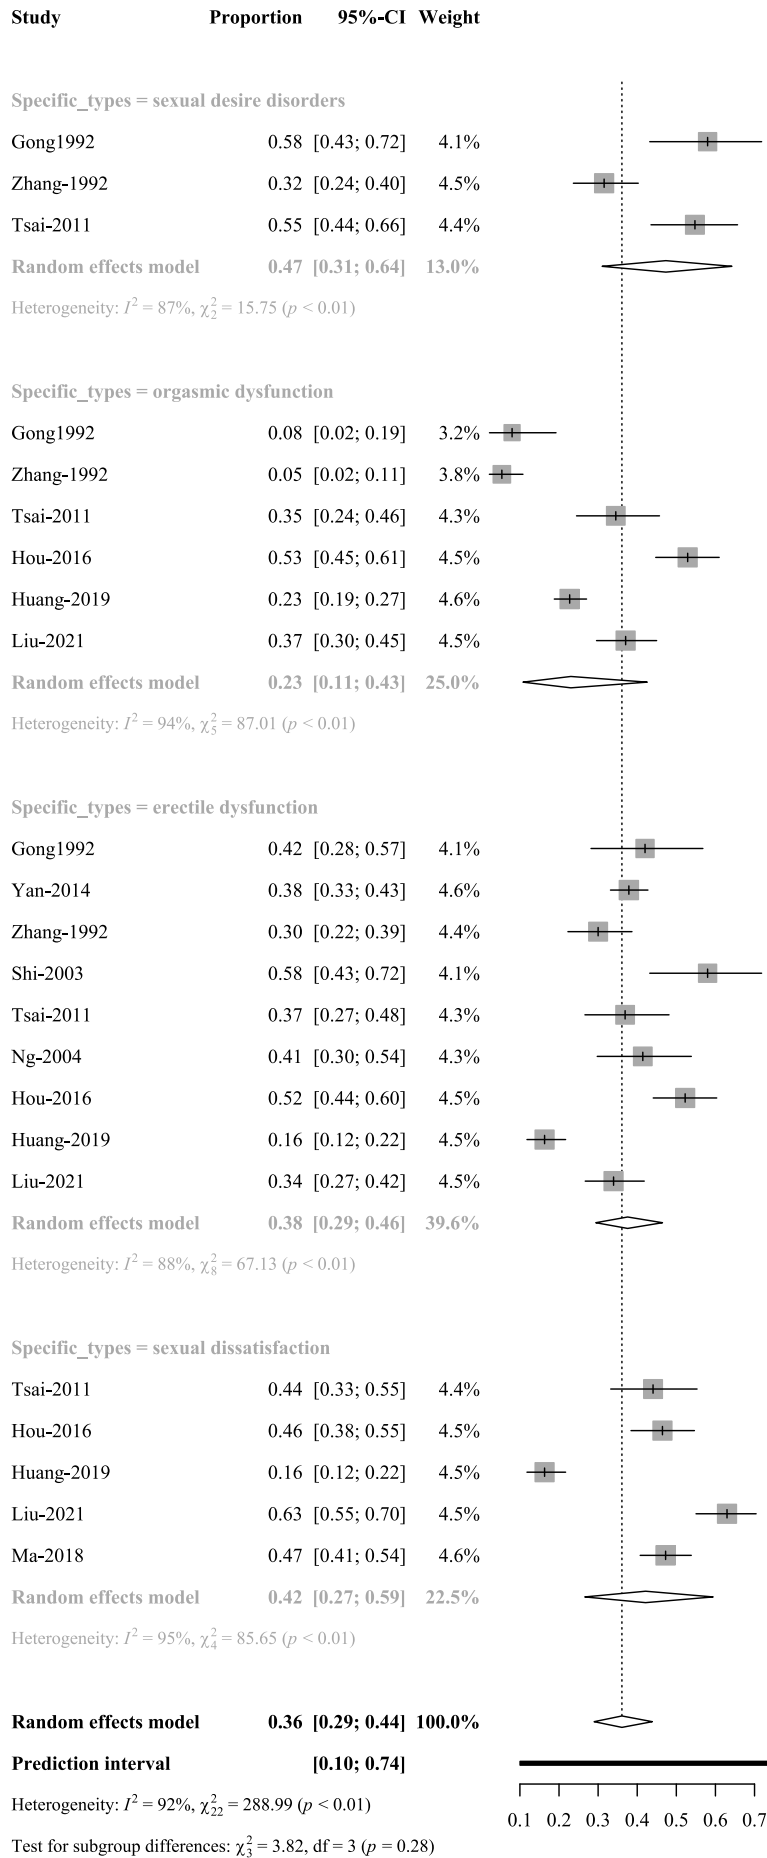



### 5.1.2 Forest plot of specific type subgroup analyses-Female

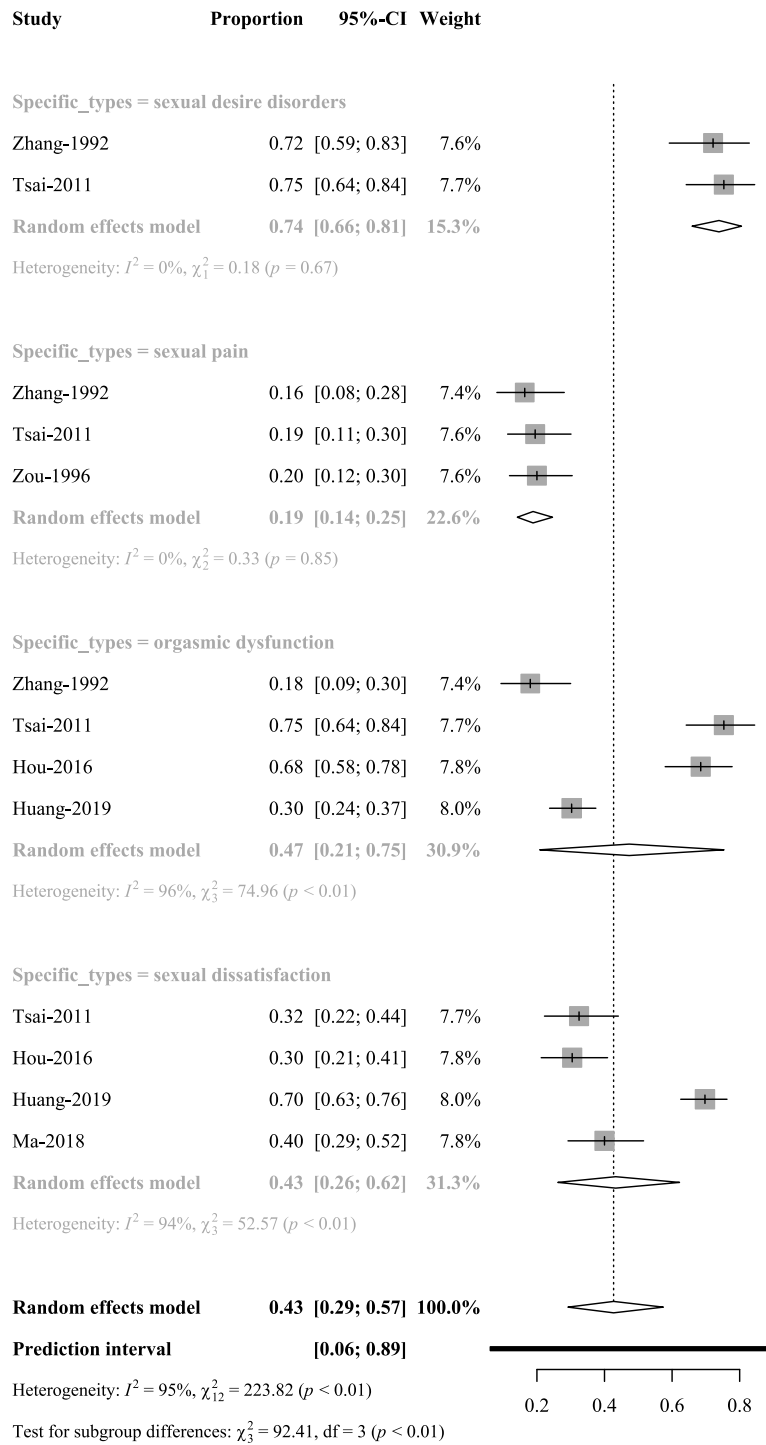

## 5.2 Forest plot of duration of illness subgroup analyses

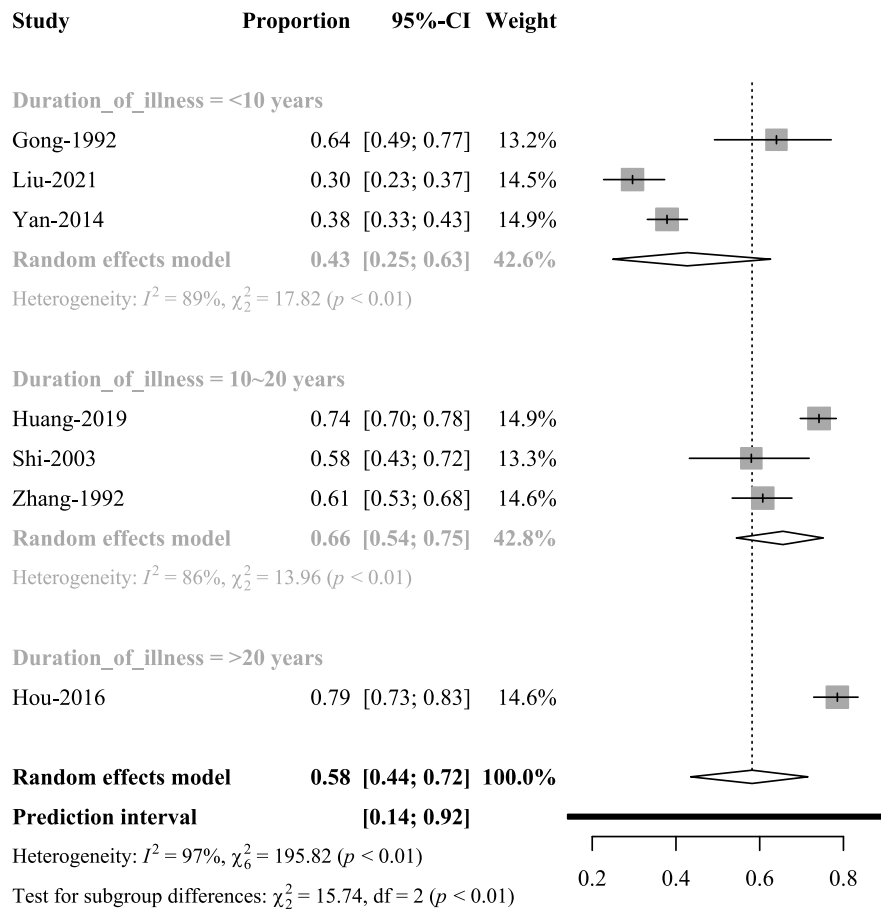

### 5.3 Forest plot of assessment tools subgroup analyses

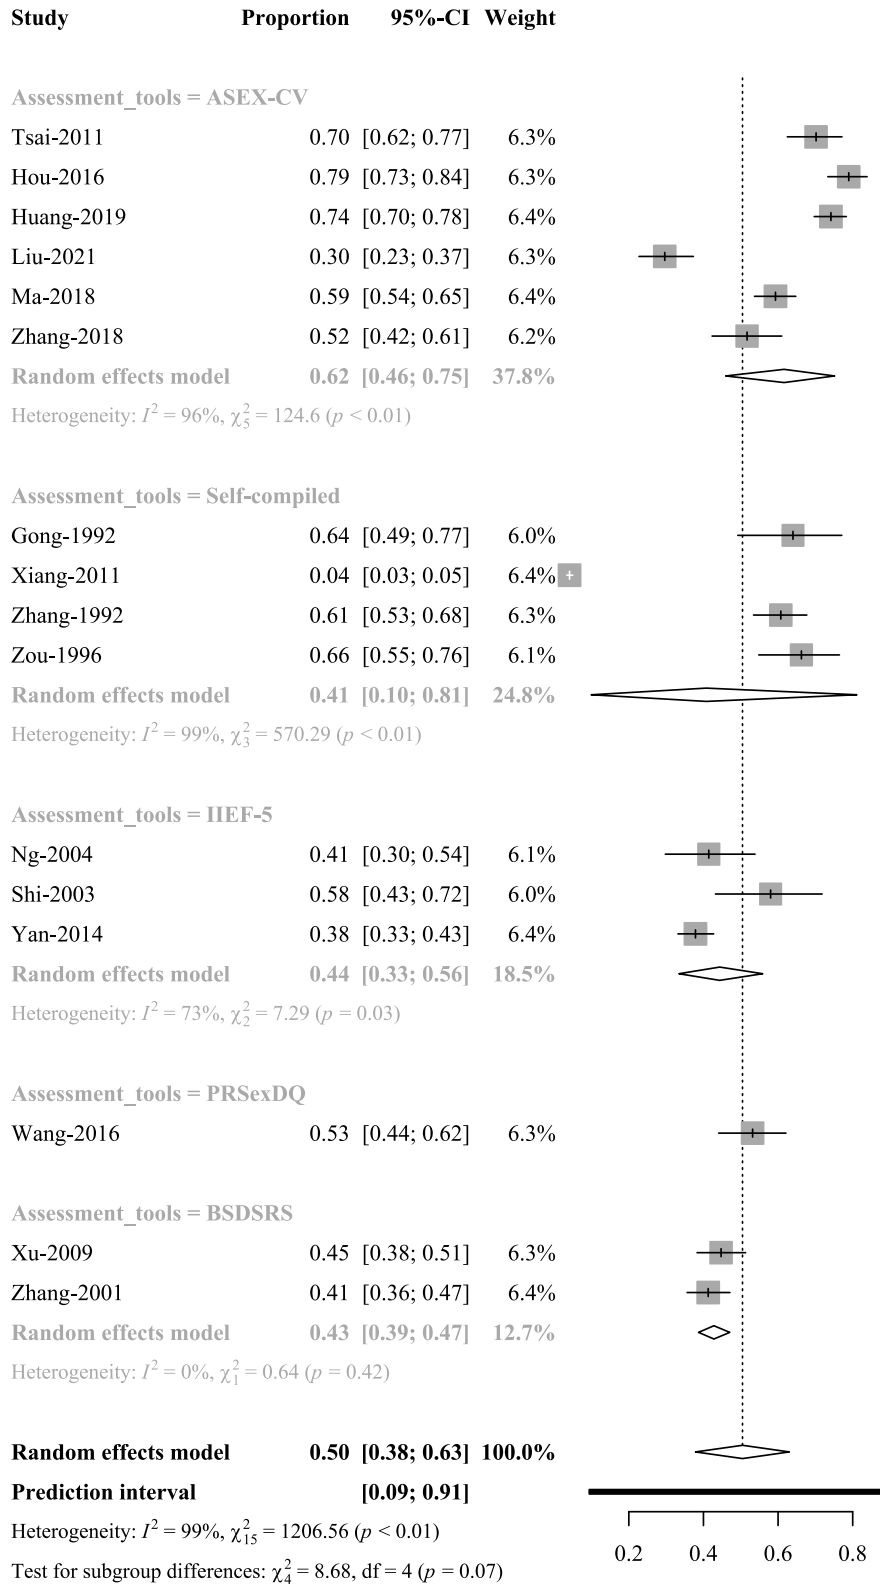

## 5.4 Forest plot of mean ages subgroup analyses

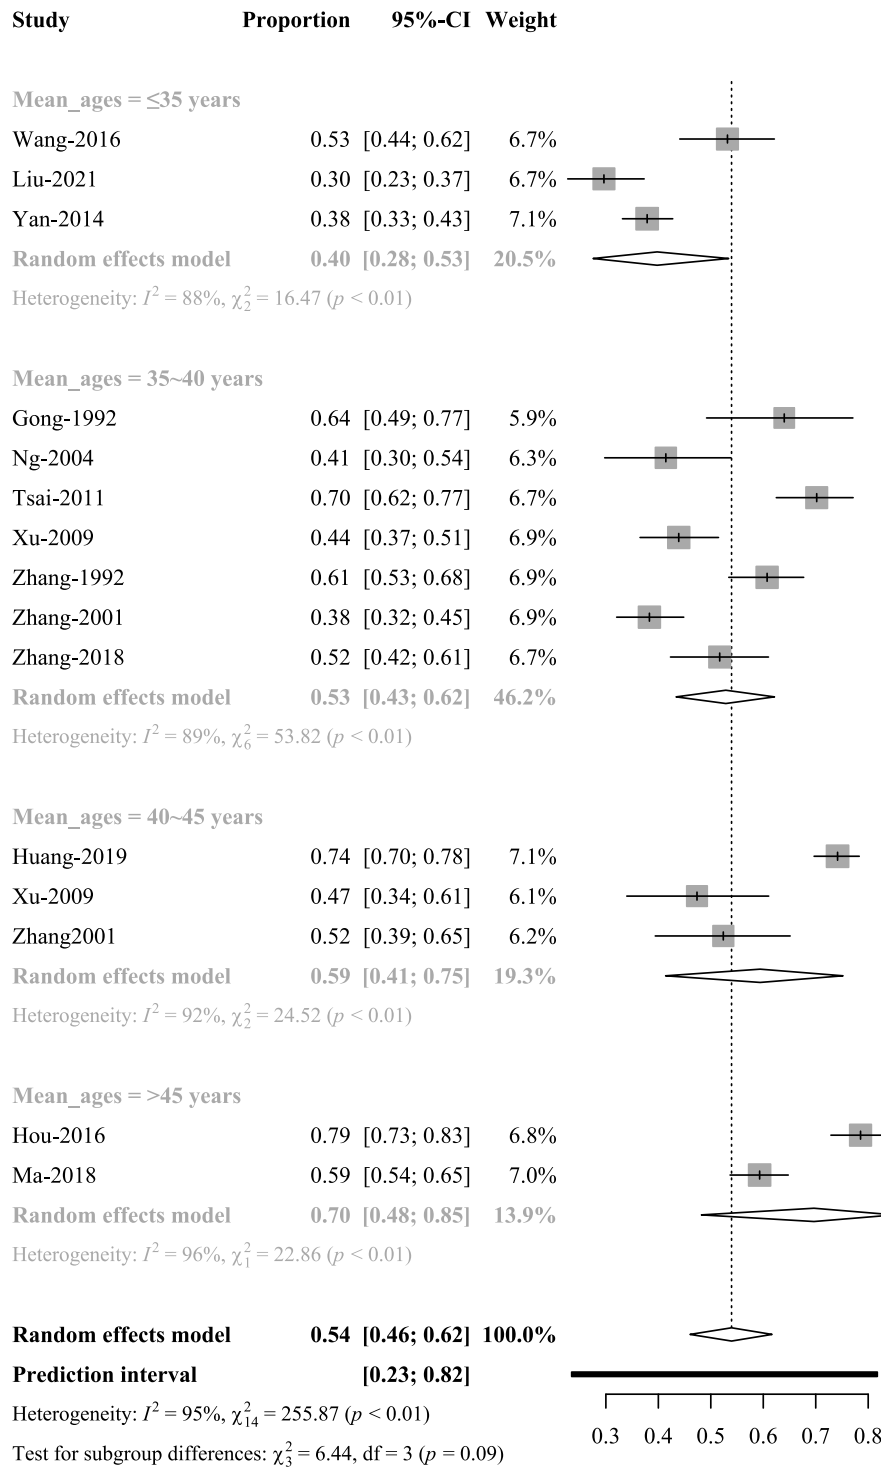

### 5.5 Forest plot of study region subgroup analyses

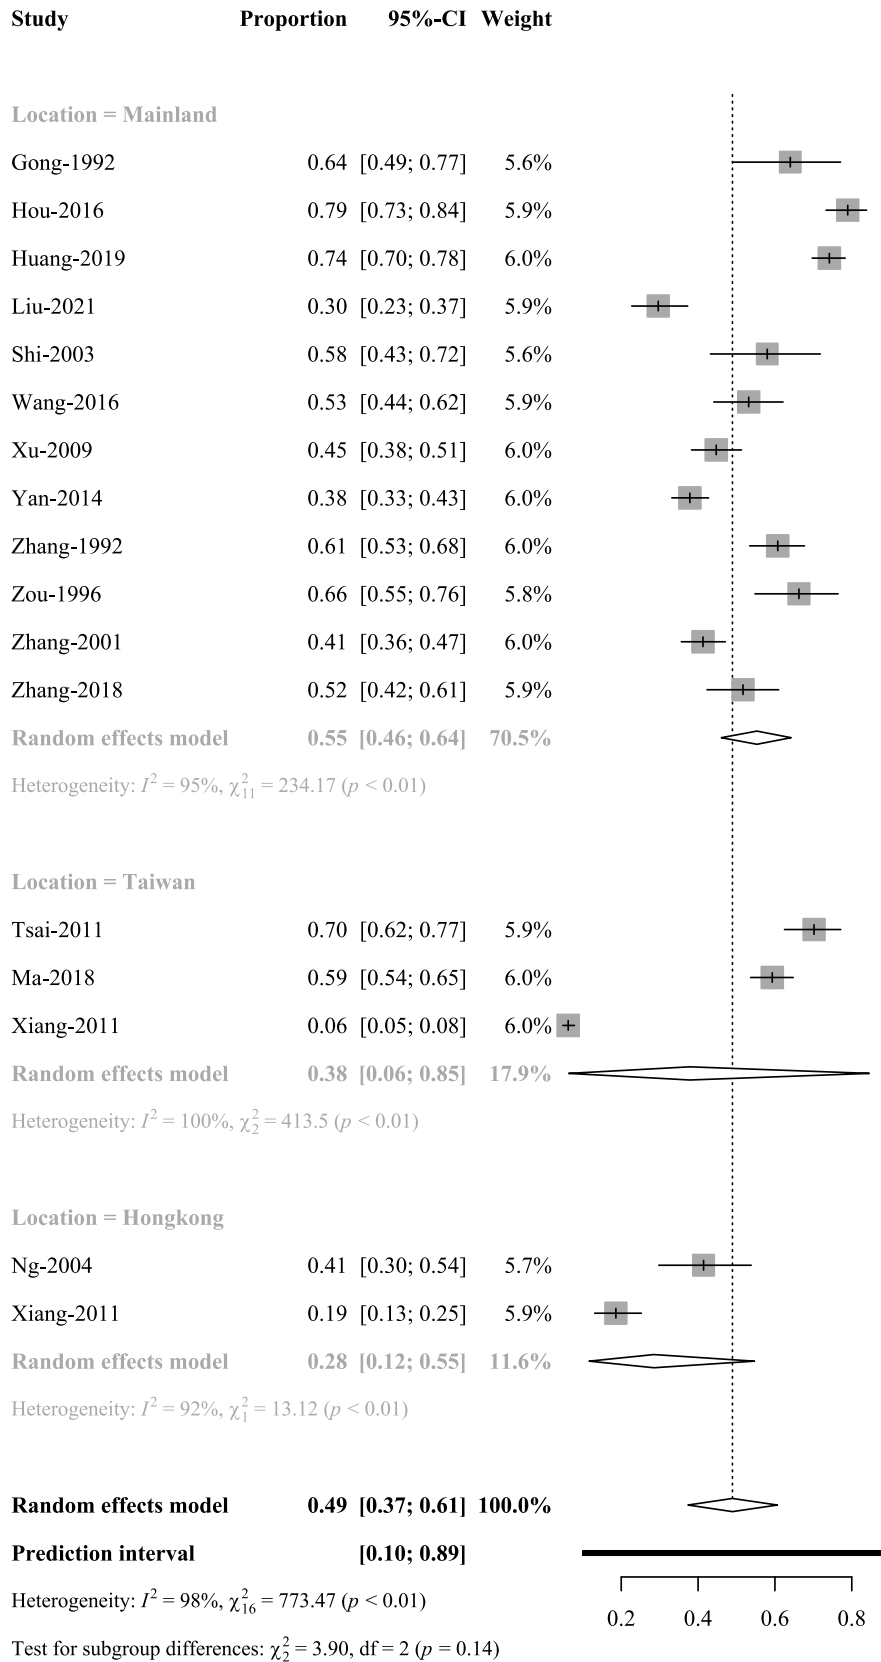

## 5.6 Forest plot of gender subgroup analyses

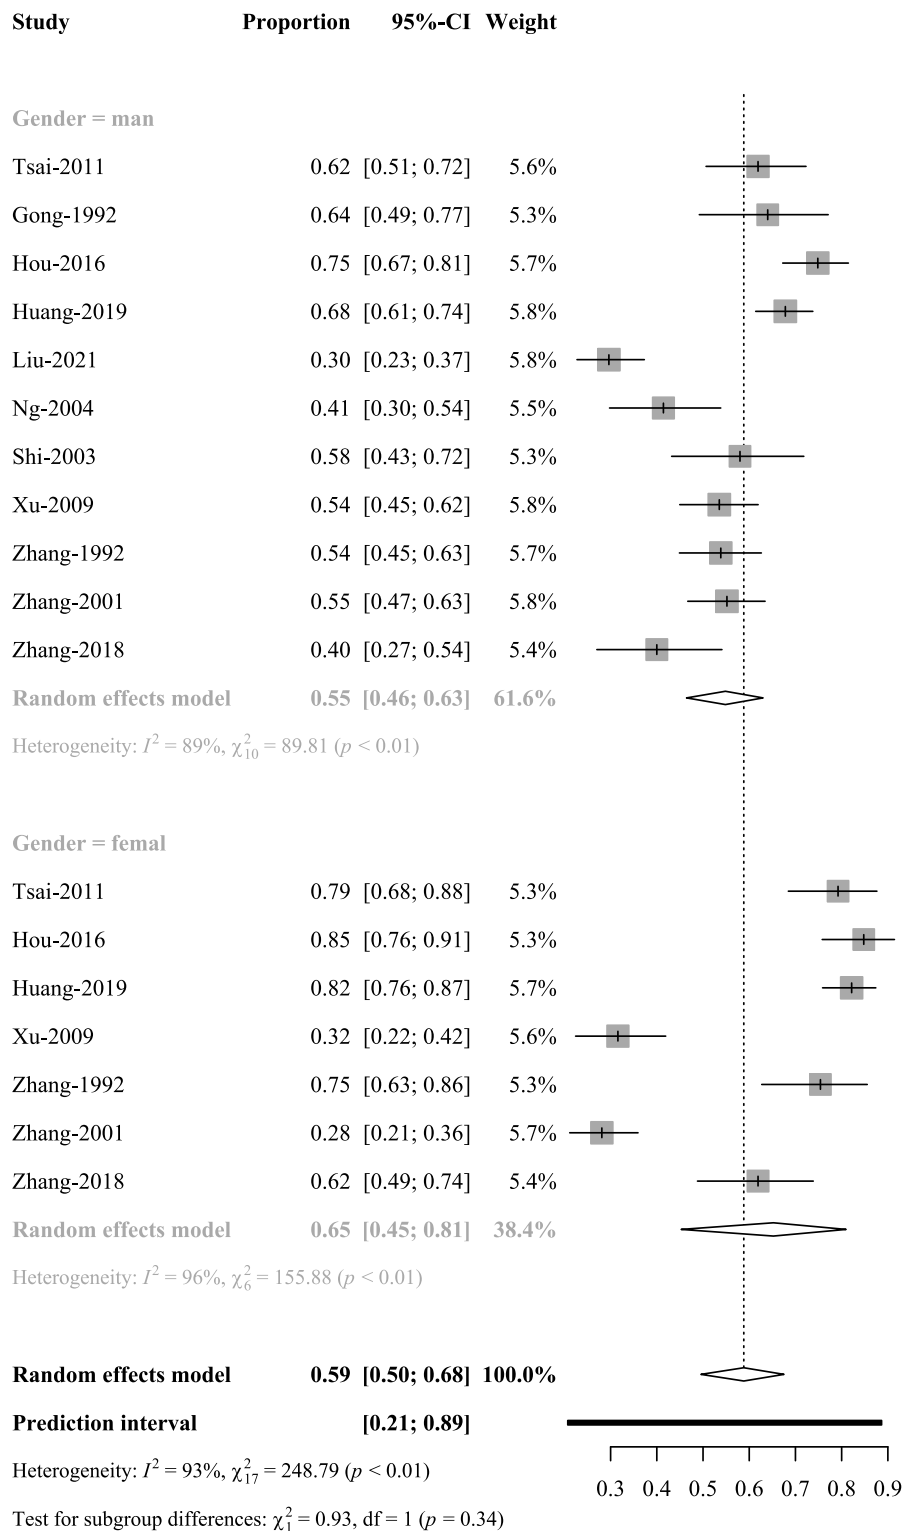

## 5.7 Forest plot of research setting subgroup analyses

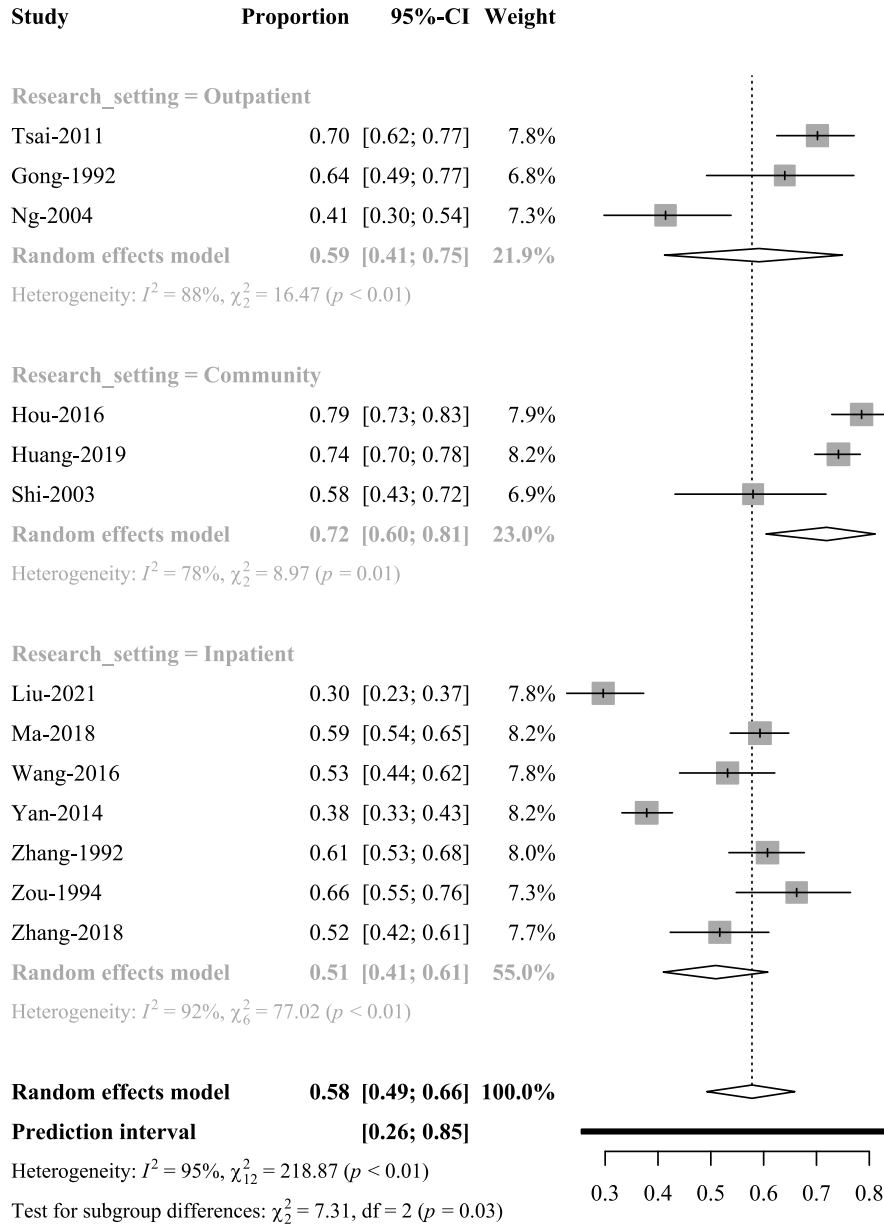

## 5.8 Forest plot of marital status subgroup analyses

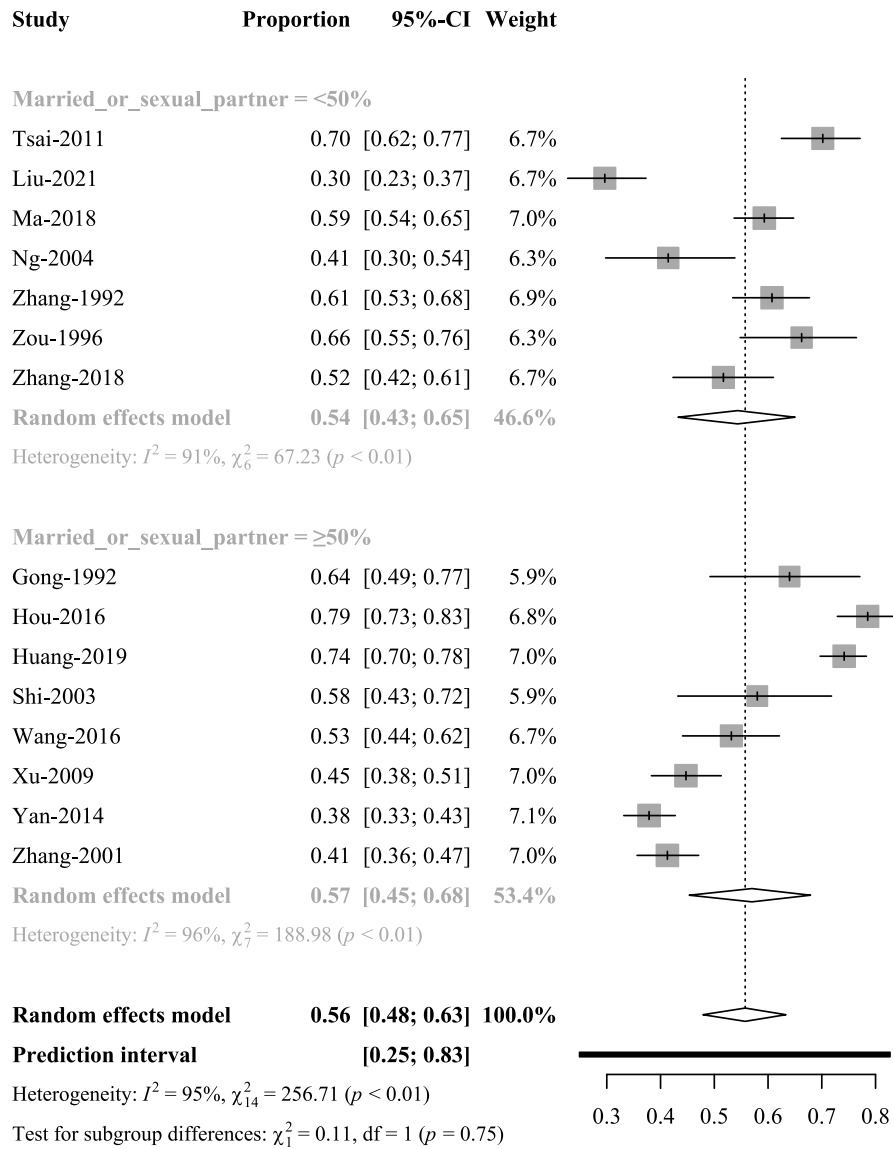



### 5.9 Forest plot of publication years subgroup analyses

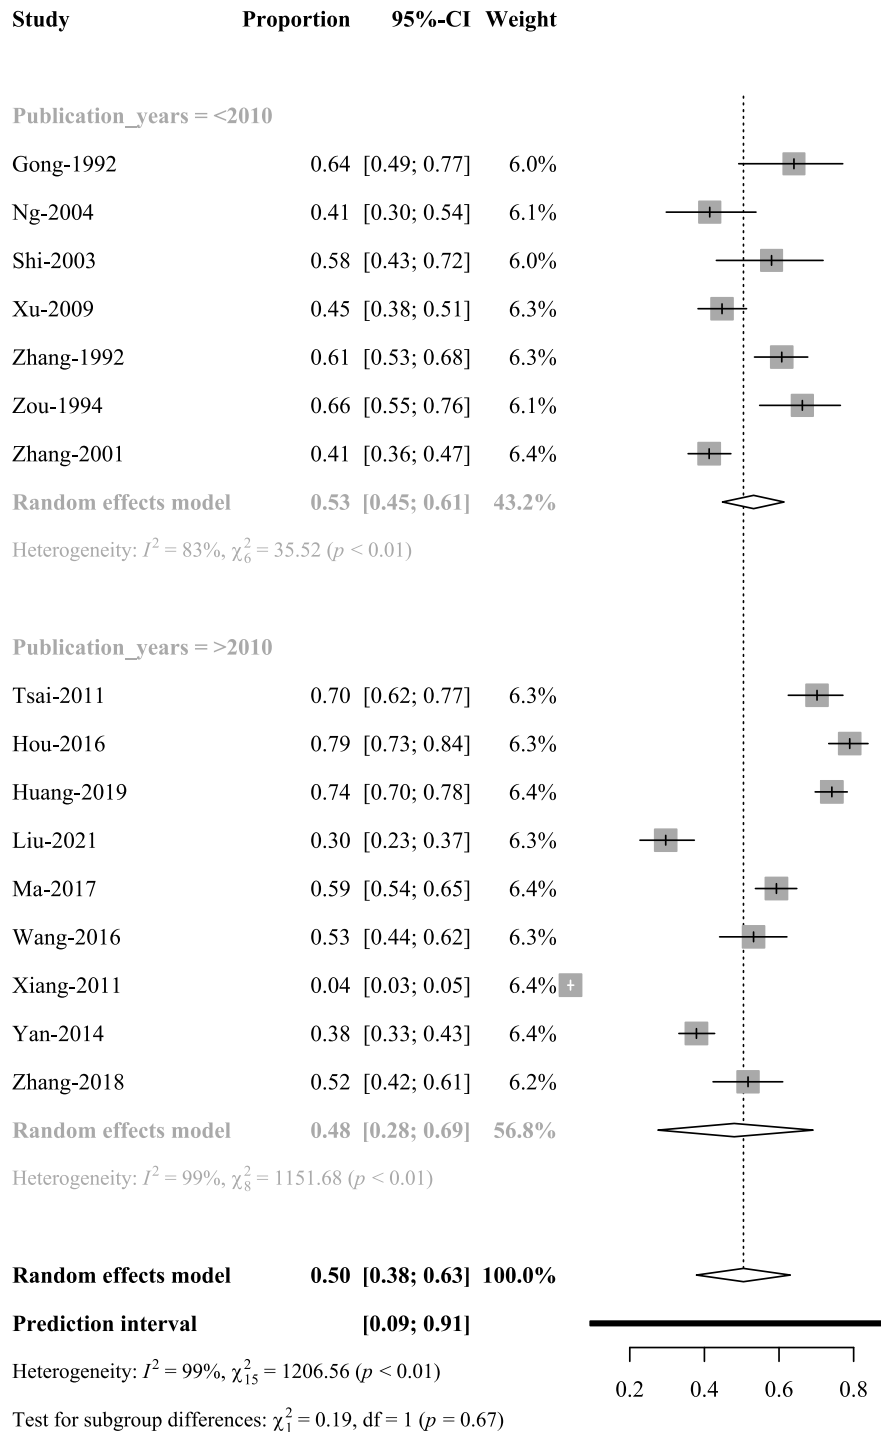

### 5.10 Forest plot of antipsychotics subgroup analyses

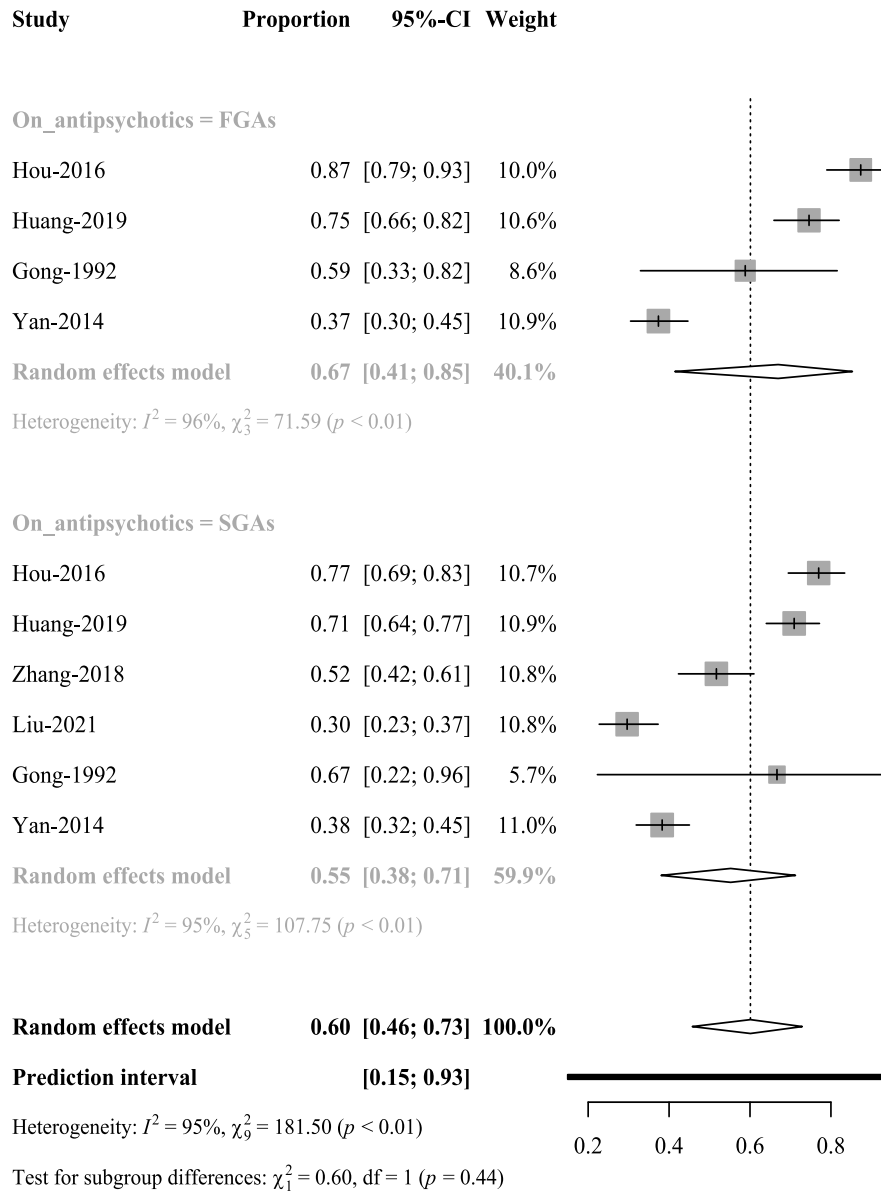

## 6. Meta-regression analyses

| Variables                   | Estimate       | Lower limit    | Upper limit    | p-value         |
|-----------------------------|----------------|----------------|----------------|-----------------|
| <b>Specific type</b>        |                |                |                |                 |
| anorgasmia                  | referent       | referent       | referent       | referent        |
| erectile dysfunction        | -0.4798        | -1.2905        | 0.3309         | 0.25            |
| <b>orgasmic dysfunction</b> | <b>-1.1757</b> | <b>-1.9628</b> | <b>-0.3886</b> | <b>&lt;0.01</b> |
| sexual desire disorders     | 0.0754         | -0.8239        | 0.9748         | 0.87            |
| <b>sexual pain</b>          | <b>-1.6974</b> | <b>-2.7093</b> | <b>-0.6855</b> | <b>&lt;0.01</b> |
| <b>Duration of illness</b>  |                |                |                |                 |
| <10 years                   | referent       | referent       | referent       | referent        |
| <b>10~20 years</b>          | <b>0.9368</b>  | <b>0.0292</b>  | <b>1.8445</b>  | <b>0.04</b>     |
| <b>&gt;20 years</b>         | <b>1.6088</b>  | <b>0.3450</b>  | <b>2.8727</b>  | <b>0.01</b>     |
| <b>Assessment tools</b>     |                |                |                |                 |
| ASEX-CV                     | referent       | referent       | referent       | referent        |
| self-designed               | -0.8614        | -2.2956        | 0.5728         | 0.24            |
| IIEF-5                      | -0.6505        | -2.2251        | 0.9242         | 0.42            |
| PRSexDQ                     | -0.3434        | -2.7390        | 2.0522         | 0.78            |
| BSDSRS                      | -0.7528        | -2.5544        | 1.0487         | 0.41            |
| <b>Mean ages</b>            |                |                |                |                 |
| ≤35 years                   | referent       | referent       | referent       | referent        |
| <b>35~40 years</b>          | <b>-1.2426</b> | <b>-2.2032</b> | <b>-0.2819</b> | <b>0.01</b>     |
| 40~45 years                 | -0.7126        | -1.5594        | 0.1342         | 0.10            |
| >45 years                   | -0.4365        | -1.4124        | 0.5393         | 0.38            |
| <b>Study region</b>         |                |                |                |                 |
| Hongkong                    | referent       | referent       | referent       | referent        |
| Taiwan                      | 0.4172         | -1.3102        | 2.1445         | 0.64            |
| Mainland                    | 1.1347         | -0.3178        | 2.5872         | 0.13            |
| <b>Gender</b>               |                |                |                |                 |
| female                      | referent       | referent       | referent       | referent        |
| male                        | -0.4272        | -1.1961        | 0.3417         | 0.28            |
| <b>Research setting</b>     |                |                |                |                 |
| Community                   | referent       | referent       | referent       | referent        |
| Outpatient                  | -0.5546        | -1.4496        | 0.3404         | 0.22            |
| <b>Inpatient</b>            | <b>-0.8895</b> | <b>-1.6302</b> | <b>-0.1487</b> | <b>0.02</b>     |
| <b>Marital status</b>       |                |                |                |                 |
| Married/sexual partner <50% | referent       | referent       | referent       | referent        |
| Married/sexual partner ≥50% | 0.1067         | -0.5467        | 0.7600         | 0.75            |
| Publication years           | -0.0118        | -0.0676        | 0.0439         | 0.68            |
| <b>On antipsychotics</b>    |                |                |                |                 |
| FGAs                        | referent       | referent       | referent       | referent        |
| SGAs                        | -0.4901        | -1.6955        | 0.7153         | 0.43            |

Bubble plot of meta-regression analyses

Publication years

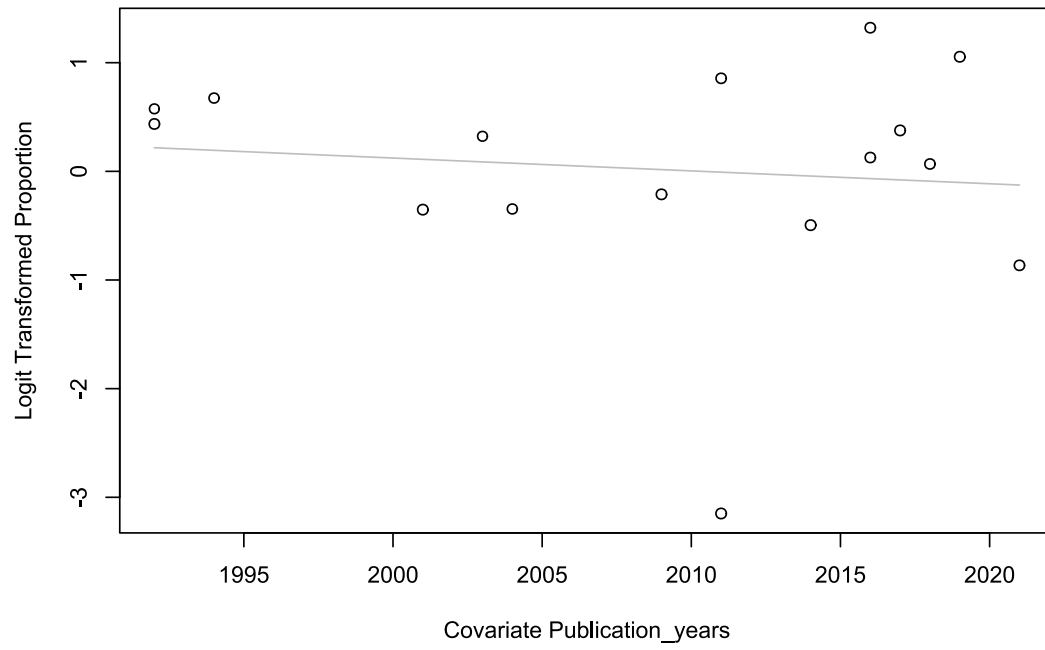

Supplement: supplement_qfae009.pdf [file supplement_qfae009.pdf]
